# Supplementary material
Source: Research Square preprint supplement (doi:10.21203/rs.3.rs-9015492/v1)
Supplement: Supplementary file 1 [file e63b588d8e2c89760f6648a2.docx]

**Supplementary materials**

Elevated concentrations of vanadium in maternal hair and umbilical cord blood with an increased risk of offspring congenital heart defects: a multi-hospital case-control study

Ting Lai 1, Liu Yang 1, Shengli Li 2, Jing Tao 3, Zhen Liu 3†, Jun Zhu 3†

1 Department of Healthcare, Chengdu Women's and Children's Central Hospital, School of Medicine, University of Electronic Science and Technology of China, Chengdu, Sichuan 611731, China.

2 Department of Ultrasound, Shenzhen Maternity and Child Healthcare Hospital, Shenzhen, Guangdong 518028, China.

3 National Center for Birth Defects Monitoring, West China Second University Hospital, Sichuan University, Chengdu, Sichuan 610041, China.

†Corresponding author:

Zhen Liu, Email: liuzhen5_1@163.com

Jun Zhu, Email: [zhujun028@163.com](mailto:zhujun028@163.com;)

**Supplementary materials include the following:**

Total figures: 6 Total tables: 10

**Figure S1.** Directed acyclic graph (DAG) of vanadium in maternal hair and umbilical cord blood and congenital heart defects in offspring for all potential confounders considered.

**Figure S2.** **A priori sample size calculation using G*Power**

****Table S1.**Covariance parameter estimates of the empty model.**

****Table S2.** Descriptive statistics for hair vanadium level in the case and control groups.**

****Table S3.** Descriptive statistics for umbilical cord blood vanadium level in the case and control groups.**

****Table S4**. Normality tests of metals concentrations data**

**Figure S3.** Histograms of hair vanadium concentrations (ng/mg) and Ln-transformed hair vanadium concentrations (ln ng/mg).

**Figure S4**. Q-Q plots of raw hair vanadium concentrations (ng/mg) and ln-transition hair vanadium concentrations (ln ng/mg).

**Figure S5.** Histogram of cord blood vanadium concentrations (µg/L)

**Figure S6.** Q-Q plot of cord blood vanadium concentrations (µg/L)

**Table S5.** Spearman rank correlation of heavy metals in maternal hair

**Table S6.** Spearman rank correlation of heavy metals in umbilical cord blood

**Table S7.** Interaction effects between V and Ni, As, Cd, Pb, and Ti in maternal hair on the risk of CHD in offspring.

**Table S8.** Interaction effects between V and Ni, As, Cd, Pb, Ti in umbilical cord blood on the risk of CHD in offspring.

**Table S9**. Sensitivity analyses for association of maternal hair vanadium concentrations and fetal CHD in the subgroup of the mothers aged <35 years

**Table S10**. Sensitivity analyses for association of umbilical cord blood vanadium concentrations and fetal CHD in the subgroup of the mothers aged <35 years


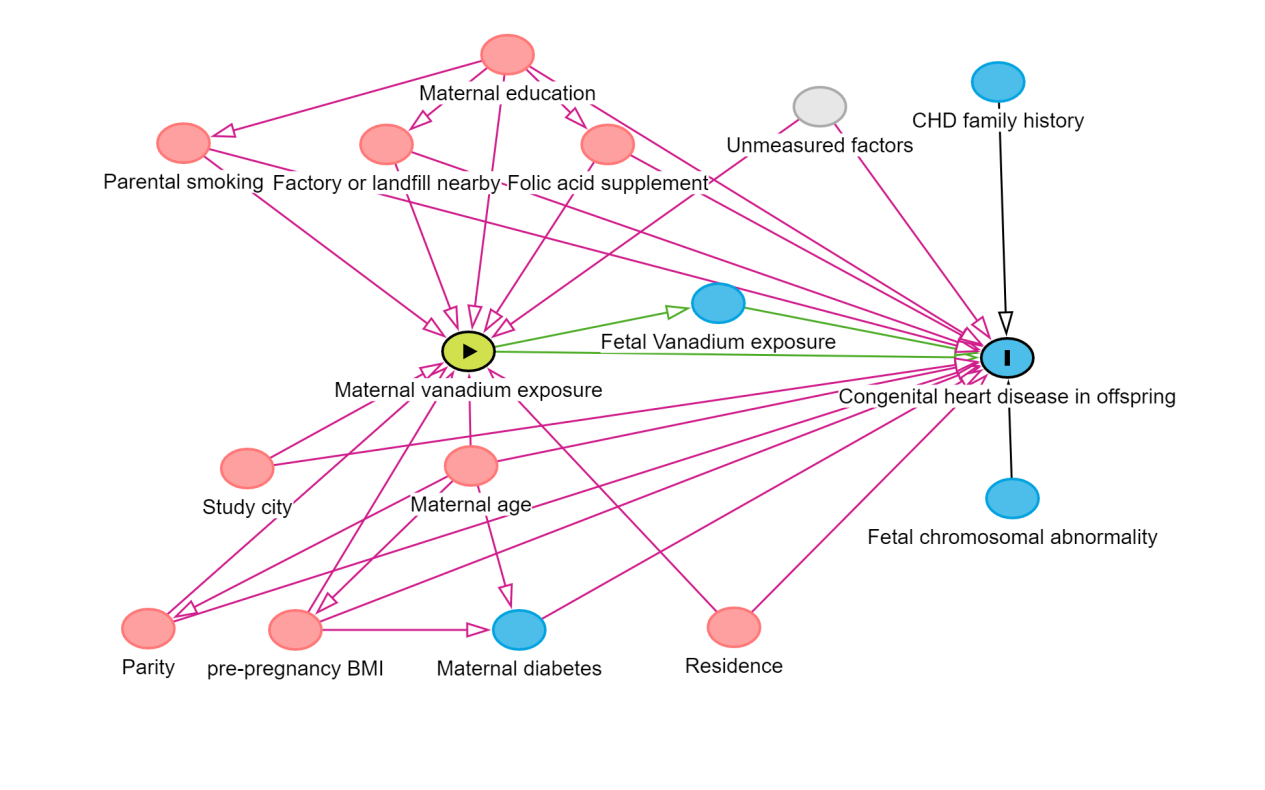


**Figure S1.** Directed acyclic graph (DAG) of vanadium in maternal hair and umbilical cord blood and congenital heart defects in offspring for all potential confounders considered.


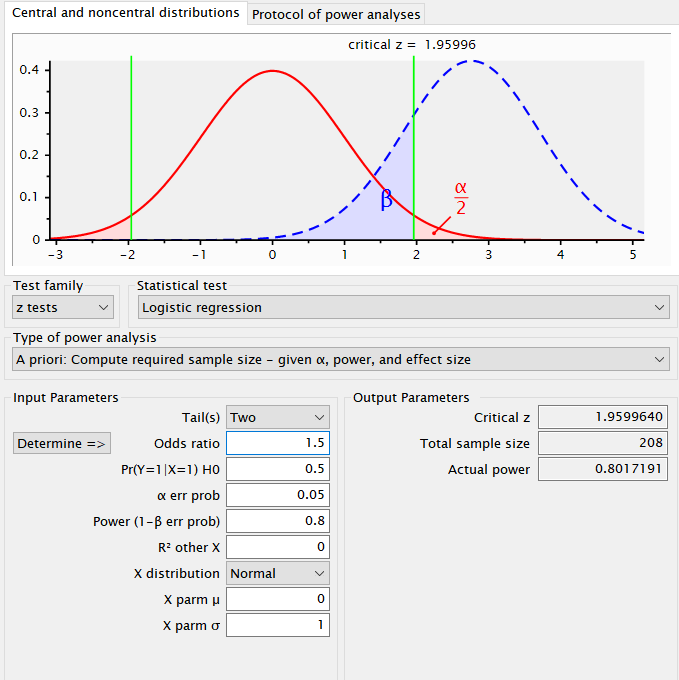


**Figure S2.** **A priori sample size calculation using G*Power**

****Table S1.**Covariance parameter estimates of the empty model.**

| Random-effects Parameters | Estimate value | Std. Err. | 95%CI | *P*-value | Intraclass Correlation Coefficient, ICC |
| --- | --- | --- | --- | --- | --- |
| var(_cons) | 0.0285684 | 0.0196976 | 0.0073959~0.1103517 | ＜0.001 | 0.0107 |

**ICC =0.107, which means that approximately 10.7% of the total variation comes from differences between hospitals.**

**ICC >0.1 indicates that variation between hospitals has a significant impact on the results, and hospital random effects need to be controlled in the model.**

****Table S2.** Descriptive statistics for hair vanadium level in the case and control groups.**

| Hair vanadium(ng/mg) | N | Mean ± SD | Geometric mean | P5 | P25 | P50 | P75 | P95 | Z | P value |
| --- | --- | --- | --- | --- | --- | --- | --- | --- | --- | --- |
| control | 377 | 0.041± 0.037 | 0.028 | 0.006 | 0.017 | 0.031 | 0.052 | 0.119 | — | — |
| case | 361 | 0.091±0.092 | 0.064 | 0.016 | 0.039 | 0.064 | 0.107 | 0.263 | -11.737 | 0.0000 |
| Septal defects | 247 | 0.087±0.084 | 0.062 | 0.016 | 0.037 | 0.063 | 0.107 | 0.225 | -8.100 | 0.0000 |
| Conotruncal defects | 173 | 0.092±0.099 | 0.065 | 0.017 | 0.038 | 0.070 | 0.107 | 0.225 | -7.031 | 0.0000 |
| Left ventricular outflow tract obstruction | 147 | 0.085±0.080 | 0.061 | 0.016 | 0.036 | 0.063 | 0.107 | 0.225 | -5.572 | 0.0000 |
| Right ventricular outflow tract obstruction | 73 | 0.114±0.131 | 0.074 | 0.019 | 0.041 | 0.073 | 0.115 | 0.403 | -4.878 | 0.0000 |
| Anomalous pulmonary venous return | 57 | 0.106±0.108 | 0.077 | 0.023 | 0.043 | 0.072 | 0.115 | 0.333 | -4.846 | 0.0000 |
| Other heart defects | 88 | 0.112±0.118 | 0.073 | 0.017 | 0.041 | 0.077 | 0.140 | 0.333 | -5.746 | 0.0000 |

****Table S3.** Descriptive statistics for umbilical cord blood vanadium level in the case and control groups.**

| Umbilical cord blood vanadium (µg/L) | N | Mean ± SD | Geometric mean | P5 | P25 | P50 | P75 | P95 | Z | P value |
| --- | --- | --- | --- | --- | --- | --- | --- | --- | --- | --- |
| control | 201 | 3.242±0.75 | 3.148 | 2.222 | 2.811 | 3.265 | 3.653 | 4.222 | — | — |
| case | 96 | 3.588±0.794 | 3.500 | 2.458 | 3.100 | 3.518 | 4.010 | 5.268 | -3.643 | 0.0003 |
| Septal defects | 66 | 3.573±0.784 | 3.498 | 2.642 | 3.055 | 3.454 | 3.841 | 5.268 | -2.226 | 0.0260 |
| Conotruncal defects | 50 | 3.716±0.850 | 3.627 | 2.642 | 3.122 | 3.528 | 4.173 | 5.461 | -3.245 | 0.0012 |
| Left ventricular outflow tract obstruction | 39 | 3.687±0.711 | 3.628 | 2.783 | 3.122 | 3.530 | 4.043 | 5.268 | -3.005 | 0.0027 |
| Right ventricular outflow tract obstruction | 18 | 3.269±0.884 | 3.126 | 1.155 | 2.642 | 3.403 | 3.864 | 4.626 | -0.085 | 0.9323 |
| Anomalous pulmonary venous return | 11 | 3.727±1.082 | 3.596 | 2.254 | 2.992 | 3.576 | 4.173 | 6.231 | -1.165 | 0.2442 |
| Other heart defects | 29 | 3.523±0.914 | 3.395 | 2.254 | 3.018 | 3.512 | 3.977 | 4.626 | -1.310 | 0.1902 |

****Table S4**. Normality tests of metals concentrations data**

|  | Mean | P50 | Skewness | Kurtosis | P-value |
| --- | --- | --- | --- | --- | --- |
| V in maternal hair | 0.065 | 0.045 | 0.5457 | 5.8167 | ＜0.001 |
| V in umbilical cord blood | 3.354 | 3.314 | 3.876 | 25.3811 | ＜0.001 |

*P* value < 0.05 indicated that both hair vanadium and umbilical cord blood vanadium data significantly deviated from a normal distribution. Skewness value > 0 confirmed a positive skewness for both datasets.

**Figure S3.** Histograms of hair vanadium concentrations (ng/mg) and ln-transformed hair vanadium concentrations (ln ng/mg).

**Figure S4**. Q-Q plots of raw hair vanadium concentrations (ng/mg) and ln-transition hair vanadium concentrations (ln ng/mg).

**Figure S5.** Histogram of cord blood vanadium concentrations (µg/L)

**Figure S6.** Q-Q plot of cord blood vanadium concentrations (µg/L)

**Table S5.** Spearman rank correlation of metals in maternal hair

|  | V | Ni | As | Cd | Pb | Ti |
| --- | --- | --- | --- | --- | --- | --- |
| V | — | *0.0000* | *0.0000* | *0.0000* | *0.0000* | *0.0000* |
| Ni | 0.5430* | — | *0.0000* | *0.0000* | *0.0000* | *0.0000* |
| As | 0.3247* | 0.1975* | — | *0.0009* | *0.0000* | *0.0000* |
| Cd | 0.2004* | 0.3362* | 0.1216* | — | *0.0000* | 0.0014 |
| Pb | 0.4181* | 0.4734* | 0.3694* | 0.5914* | — | *0.0000* |
| Ti | 0.6894* | 0.4304* | 0.3340* | 0.1174* | 0.3574* | — |

Note, Lower left presents spearman rank correlation coefficients, upper right presents P-values for correlations, * means P <0.05.

V, vanadium; Ni, nickel; As, arsenic; Cd, cadmium; Pb, lead; Ba, barium; Al, aluminum and Ti, titanium.

**Table S6.** Spearman rank correlation of metals in umbilical cord blood

|  | V | Ni | As | Cd | Pb | Ti |
| --- | --- | --- | --- | --- | --- | --- |
| V | — | *0.0004* | *0.0404* | *0.0990* | *0.2420* | *0.0000* |
| Ni | 0.2030* | — | *0.2069* | *0.0000* | *0.0000* | *0.1055* |
| As | -0.1190* | 0.0734 | — | *0.6927* | *0.5353* | *0.8016* |
| Cd | 0.0959 | 0.2631* | -0.0230 | — | *0.0000* | *0.1616* |
| Pb | 0.0681 | 0.2481* | 0.0361 | 0.2661* | — | *0.0099* |
| Ti | 0.3925* | 0.0941 | 0.0146 | 0.0814 | 0.1496* | — |

Note, Lower left presents spearman rank correlation coefficients, upper right presents P-values for correlations, * means P <0.05.

V, vanadium; Ni, nickel; As, arsenic; Cd, cadmium; Pb, lead; Ba, barium; Al, aluminum and Ti, titanium.

**Table S7**. Interaction effects between V and Ni, As, Cd, Pb, and Ti in maternal hair on the risk of CHD in offspring.

| Maternal hair | case(%) | AOR(95%CI) | *P*-value | S | AP | RERI | *P* |
| --- | --- | --- | --- | --- | --- | --- | --- |
| V/Ni category |  |  |  |  |  |  |  |
| Low V and low Ni | 88(11.92) | Ref. |  | 2.753 | 0.536 | 3.392 | **0.009** |
| Low V and high Ni | 26(3.52) | 0.648(0.363~1.157) | 0.143 |  |  |  |  |
| High V and low Ni | 62(8.40) | 3.287(1.938~5.576) | 0.000 |  |  |  |  |
| High V and high Ni | 185(25.07) | 6.327(4.033~9.927) | 0.000 |  |  |  |  |
| Cross-Product term for interaction |  | **2.971(1.372~6.432)** | **0.006** |  |  |  |  |
| V/As category |  |  |  |  |  |  |  |
| Low V and low As | 54(7.32) | Ref. |  | 2.016 | 0.462 | 5.534 | **0.03** |
| Low V and high As | 60(8.13) | 2.211(1.329~3.679) | 0.002 |  |  |  |  |
| High V and low As | 84(11.38) | 5.235(3.131~8.753) | 0.000 |  |  |  |  |
| High V and high As | 163(22.09) | 11.980(7.113~20.177) | 0.000 |  |  |  |  |
| Cross-Product term for interaction |  | 1.035(0.516~2.075) | 0.923 |  |  |  |  |
| V/Cd category |  |  |  |  |  |  |  |
| Low V and low Cd | 68(9.21) | Ref. |  | 0.628 | -0.457 | -2.005 | 0.189 |
| Low V and high Cd | 46(6.23) | 0.756(0.452~1.265) | 0.287 |  |  |  |  |
| High V and low Cd | 109(14.77) | 6.635(4.000~11.008) | 0.000 |  |  |  |  |
| High V and high Cd | 138(18.70) | 4.387(2.762~6.969) | 0.000 |  |  |  |  |
| Cross-Product term for interaction |  | 0.874(0.434~1.759) | 0.706 |  |  |  |  |
| V/Pb category |  |  |  |  |  |  |  |
| Low V and low Pb | 73(9.89) | Ref. |  | 1.560 | 0.300 | 1.809 | 0.170 |
| Low V and high Pb | 41(5.56) | 0.812(0.478~1.381) | 0.443 |  |  |  |  |
| High V and low Pb | 81(10.98) | 4.419(2.650~7.369) | 0.000 |  |  |  |  |
| High V and high Pb | 166(22.49) | 6.040(3.789~9.630) | 0.000 |  |  |  |  |
| Cross-Product term for interaction |  | 1.682(0.824~3.437) | 0.153 |  |  |  |  |
| V/Ti category |  |  |  |  |  |  |  |
| Low V and low Ti | 87(11.79) | Ref. |  | 17.679 | 0.852 | 8.837 | **0.000** |
| Low V and high Ti | 27(3.66) | 1.019(0.546~1.901) | 0.953 |  |  |  |  |
| High V and low Ti | 36(4.88) | 1.511(0.833~2.741) | 0.175 |  |  |  |  |
| High V and high Ti | 211(28.59) | 10.366(6.460~16.635) | 0.000 |  |  |  |  |
| Cross-Product term for interaction |  | **6.733(2.733~16.590)** | **0.000** |  |  |  |  |

Analyses were adjusted for tudy city, maternal age, parity, pre-pregnancy body mass index, education, residence, folic acid supplement, parental smoking, and factory or landfill nearby.

Low: equal or below median level; High: above median level

**Table S8.** Interaction effects between V and Ni, As, Cd, Pb, Ti in umbilical cord blood on the risk of CHD in offspring.

| Umbilical cord blood | case(%) | AOR(95%CI) | *P*-value | S | AP | RERI | *P* |
| --- | --- | --- | --- | --- | --- | --- | --- |
| V/Ni category |  |  |  |  |  |  |  |
| Low V and low Ni | 24(8.08) | ref. |  | 0.448 | -0.561 | -1.027 | 0.425 |
| Low V and high Ni | 15(5.05) | 1.754(0.687~4.481) | 0.240 |  |  |  |  |
| High V and low Ni | 24(8.08) | 2.104(0.834~5.305) | 0.115 |  |  |  |  |
| High V and high Ni | 33(11.11) | 1.832(0.784~4.279) | 0.162 |  |  |  |  |
| Cross-Product term for interaction |  | 0.496(0.135~1.822) | 0.291 |  |  |  |  |
| V/As category |  |  |  |  |  |  |  |
| Low V and low As | 22(7.41) | Ref. |  | -0.604 | -3.969 | -1.591 | 0.155 |
| Low V and high As | 17(5.72) | 0.585(0.233~1.470) | 0.254 |  |  |  |  |
| High V and low As | 43(14.48) | 2.407(1.028~5.633) | 0.043 |  |  |  |  |
| High V and high As | 14(4.71) | 0.401(0.144~1.114) | 0.080 |  |  |  |  |
| Cross-Product term for interaction |  | 0.285(0.074~1.089) | 0.066 |  |  |  |  |
| V/Cd category |  |  |  |  |  |  |  |
| Low V and low Cd | 25(8.42) | Ref. |  | 0.173 | 0.325 | 0.305 | 0.572 |
| Low V and high Cd | 14(4.71) | 0.424(0.160~1.121) | 0.084 |  |  |  |  |
| High V and low Cd | 30(10.10) | 1.208(0.532~2.741) | 0.651 |  |  |  |  |
| High V and high Cd | 27(9.09) | 0.936(0.387~2.266) | 0.884 |  |  |  |  |
| Cross-Product term for interaction |  | 1.829(0.504~6.639) | 0.358 |  |  |  |  |
| V/Pb category |  |  |  |  |  |  |  |
| Low V and low Pb | 17(5.72) | Ref. |  | 0.025 | -1.078 | -1.108 | 0.277 |
| Low V and high Pb | 22(7.41) | 1.040(0.418~2.587) | 0.933 |  |  |  |  |
| High V and low Pb | 25(8.42) | 2.097(0.922~4.770) | 0.077 |  |  |  |  |
| High V and high Pb | 32(10.77) | 1.029(0.404~2.622) | 0.953 |  |  |  |  |
| Cross-Product term for interaction |  | 0.472(0.131~1.692) | 0.249 |  |  |  |  |
| V/Ti category |  |  |  |  |  |  |  |
| Low V and low Ti | 28(9.43) | Ref. |  | 0.233 | -0.716 | -0.916 | 0.395 |
| Low V and high Ti | 11(3.70) | 1.017(0.398~2.600) | 0.972 |  |  |  |  |
| High V and low Ti | 25(8.42) | 2.178(0.888~5.339) | 0.089 |  |  |  |  |
| High V and high Ti | 32(10.77) | 1.279(0.583~2.805) | 0.540 |  |  |  |  |
| Cross-Product term for interaction |  | 0.577(0.161~2.077) | 0.400 |  |  |  |  |

Analyses were adjusted for tudy city, maternal age, parity, pre-pregnancy body mass index, education, residence, folic acid supplement, parental smoking, and factory or landfill nearby.

Low: equal or below median level; High: above median level

Table S9. Sensitivity analyses for association of maternal hair vanadium concentrations and fetal CHD in the subgroup of the mothers aged <35 years

| Group | Total Ln (hairV) | hair low N=226 | hair medium  N=223 | hair high  N=221 |
| --- | --- | --- | --- | --- |
| 0.031≤ng/mg | 0.032~0.065ng/mg | >0.065ng/mg |
| **Control (%)** | 336 | 170(50.60) | 110(32.74) | 56(16.67) |
| **Case (%)** | 334 | 56(16.77) | 113(33.83) | 165(49.40) |
| Crude OR(95 CI) | 3.066(2.455~3.828)*** | Ref. | 3.119(2.090-4.653)*** | 8.945(5.831-13.721)*** |
| Adjusted OR(95% CI)‡ | 3.575(2.709-4.717)*** | Ref. | 3.312(2.072-5.295)*** | 12.093(7.077-20.662)*** |
| Adjusted OR(95% CI) (metals)† | 2.046(1.453-2.881)*** | Ref. | 1.775(1.046-7.514)* | 3.856(1.979-7.514)*** |
| **Septal defects (N)** | 228 | 42(18.42) | 77(33.77) | 109(47.81) |
| Adjusted OR(95% CI)‡ | 2.340(1.819-3.010)*** | Ref. | 2.166(1.338-3.505)** | 5.060(3.011-8.504)*** |
| Adjusted OR(95% CI) (metals)† | 1.439(1.032-2.005)* | Ref. | 1.292(0.755-2.211) | 1.898(0.976-3.689) |
| **Conotruncal defects (N)** | 164 | 30(18.29) | 47(28.66) | 87(53.05) |
| Adjusted OR(95% CI)‡ | 2.302(1.771-2.992)*** | Ref. | 1.909(1.093-3.334)* | 4.916(2.817-8.580)*** |
| Adjusted OR(95% CI) (metals)† | 1.704(1.165-2.492)** | Ref. | 1.297(0.714-2.354) | 2.444(1.196-4.998)* |
| **Left ventricular outflow track obstruction (N)** | 135 | 22(16.30) | 46(34.07) | 67(49.63） |
| Adjusted OR(95% CI)‡ | 2.004(1.527-2.631)*** | Ref. | 2.324(1.267-4.262)** | 4.487(2.398-8.394)*** |
| Adjusted OR(95% CI) (metals)† | 1.244(0.857-1.806) | Ref. | 1.491(0.787-2.827) | 1.766(0.810-3.849) |
| **Right ventricular outflow track obstruction (N)** | 69 | 11(15.94) | 19(27.54) | 39(56.52) |
| Adjusted OR(95% CI)‡ | 2.039(1.467-2.834)*** | Ref. | 2.144(0.939-4.893) | 3.865(1.777-8.404)** |
| **Anomalous pulmonary venous return (N)** | 53 | 5(9.43) | 17(32.08) | 31(58.49) |
| Adjusted OR(95% CI)‡ | 2.018(1.379-2.952)*** | Ref. | 4.159(1.324-13.066)* | 7.136(2.355-21.621)** |
| Adjusted OR(95% CI) (metals)† | 1.419(0.794-2.535) | Ref. | 2.887(0.899-9.274) | 4.244(1.178-15.294)* |
| **Other heart defects (N)** | 82 | 10(12.20) | 26(31.71) | 46(56.10) |
| Adjusted OR(95% CI)‡ | 2.099(1.526-2.889)*** | Ref. | 3.807(1.544-9.386)** | 7.998(3.208-19.940)*** |
| Adjusted OR(95% CI) (metals)† | 1.199(0.719~2.000) | Ref. | 2.426(0.915-6.432) | 3.355(1.044-10.776)* |

‡Adjusted for study city, maternal age, parity, pre-pregnancy body mass index, education, residence, folic acid supplement, parental smoking, and factory or landfill nearby.

†Adjusted for potential confounders described above, and the Ln-transformed metals concentrations of nickel (Ni), arsenic (As), cadmium (Cd), lead (Pb) and titanium (Ti).

*P < 0.05, **P < 0.01, ***P< 0.001.

Table S10. Sensitivity analyses for association of umbilical cord blood vanadium concentrations and fetal CHD in the subgroup of the mothers aged <35 years

| Group | **Total V µg/L** | **blood low N=91** | **blood medium**  **N=91** | **blood high**  **N=91** |
| --- | --- | --- | --- | --- |
| **3.030≤µg/L** | **3.051~3.602 µg/L** | **>3.602 µ**g/L |
| **Control (%)** | 185 | 72(38.92) | 59(31.89) | 54(29.19) |
| **Case (%)** | 88 | 19(21.59) | 32(36.36) | 37(42.05) |
| Crude OR(95 CI) | 1.744(1.223-2.485)** | Ref. | 2.055(1.058-3.992)* | 2.596(1.347-5.004)** |
| Adjusted OR(95% CI)‡ | 1.581(1.037-2.410)* | Ref. | 1.324(0.569-3.081) | 1.998(0.897-4.451) |
| Adjusted OR(95% CI) (metals)† | 1.823(1.134-2.932)* | Ref. | 1.527(0.618-3.772) | 2.231(0.902-5.518) |
| **Septal defects (N)** | 58 | 14(24.14) | 24(41.38) | 20(34.48) |
| Adjusted OR(95% CI)‡ | 1.358(0.891-2.069) | Ref. | 1.511(0.671-3.404) | 1.231(0.531-2.854) |
| Adjusted OR(95% CI) (metals)† | 1.699(1.073-2.688)* | Ref. | 2.095(0.870-5.045) | 1.702(0.659-4.395) |
| **Conotruncal defects (N)** | 46 | 9(19.57) | 17(36.96) | 20(43.48) |
| Adjusted OR(95% CI)‡ | 1.665(1.050-2.641)* | Ref. | 1.325(0.499-3.519) | 1.997(0.779-5.118) |
| Adjusted OR(95% CI) (metals)† | 2.136(1.299-3.513)** | Ref. | 1.653(0.576-4.746) | 2.867(0.983-8.364) |
| **Left ventricular outflow track obstruction (N)** | 38 | 5(13.16) | 15(39.47) | 18(47.37) |
| Adjusted OR(95% CI)‡ | 2.146(1.243-3.706)** | Ref. | 2.971(0.905-9.750) | 4.114(1.263-13.404)* |
| Adjusted OR(95% CI) (metals)† | 2.511(1.425-4.426)** | Ref. | 4.807(1.281-18.032)* | 7.064(1.825-27.352)** |
| **Right ventricular outflow track obstruction (N)** | 18 | 6(33.33) | 5(27.78) | 7(38.89) |
| Adjusted OR(95% CI)‡ | 0.688(0.326-1.450) | Ref. | 0.555(0.132-2.323) | 0.759(0.204-2.829) |
| Adjusted OR(95% CI) (metals)† | 0.702(0.300-1.646) | Ref. | 0.588(0.123-2.815) | 0.694(0.152-3.174) |
| **Anomalous pulmonary venous return (N)** | 10 | 3(30.00) | 2(20.00) | 5(50.00) |
| Adjusted OR(95% CI)‡ | 2.230(0.778-6.391) | Ref. | 0.173(0.011-2.719) | 1.291(0.180-9.259) |
| Adjusted OR(95% CI) (metals)† | 1.767(0.552-5.656) | Ref. | 0.056(0.002-1.619) | 0.326(0.021-4.999) |
| **Other heart defects (N)** | 28 | 7(25.00) | 9(32.14) | 12(42.86) |
| Adjusted OR(95% CI)‡ | 1.250(0.669-2.233) | Ref. | 0.875(0.273-2.799) | 1.240(0.404-3.807) |
| Adjusted OR(95% CI) (metals)† | 1.339(0.740-2.424) | Ref. | 0.923(0.258-3.302) | 1.553(0.440-5.479) |

‡Adjusted for study city, maternal age, parity, pre-pregnancy body mass index, education, residence, folic acid supplement, parental smoking, and factory or landfill nearby.

†Adjusted for potential confounders described above, and the metals concentrations of nickel (Ni), arsenic (As), cadmium (Cd), lead (Pb) and titanium (Ti).

*P < 0.05, **P < 0.01, ***P< 0.001.
